# Supplementary material
Source: Royal Society of Chemistry journal article supplement (doi:10.1039/d6ja00092d)
Supplement: d6ja00092d1.pdf [file d6ja00092d1.pdf]

**PLS Regression-Assisted LIBS for Simultaneous Quantitative Analysis of five REEs  
and TREO in Rare Earth Ores**

**Jingzhong Liu<sup>a</sup>, Rongling Zhang<sup>a</sup>, Qiao Li<sup>a</sup>, Xudong Ren<sup>b,\*</sup>, Yu Liu<sup>c</sup>, Yanyan Xu<sup>b</sup>, Tianlong Zhang<sup>a,\*</sup>,  
Hongsheng Tang<sup>a</sup>, Hua Li<sup>a,d,\*</sup>**

*<sup>a</sup>Key Laboratory of Synthetic and Natural Functional Molecular of the Ministry of Education, College of  
Chemistry & Material Science, Northwest University, Xi'an, 710127, China*

*<sup>b</sup>Baotou Research Institute of Rare Earths, Baotou 014030, Inner Mongolia, China*

*<sup>c</sup>Baotou Rewin Rare Earth Metal Materials Co, Ltd, Baotou 014010, China*

*<sup>d</sup>College of Chemistry and Chemical Engineering, Xi'an Shiyou University, Xi'an, 710065, China*

*\*Corresponding authors.*

*E-mail addresses: [a25341537@163.com](mailto:a25341537@163.com) (X.D Ren), [tlzhang@nwu.edu.cn](mailto:tlzhang@nwu.edu.cn) (T.L. Zhang),*

*[huali@nwu.edu.cn](mailto:huali@nwu.edu.cn) (H. Li)*

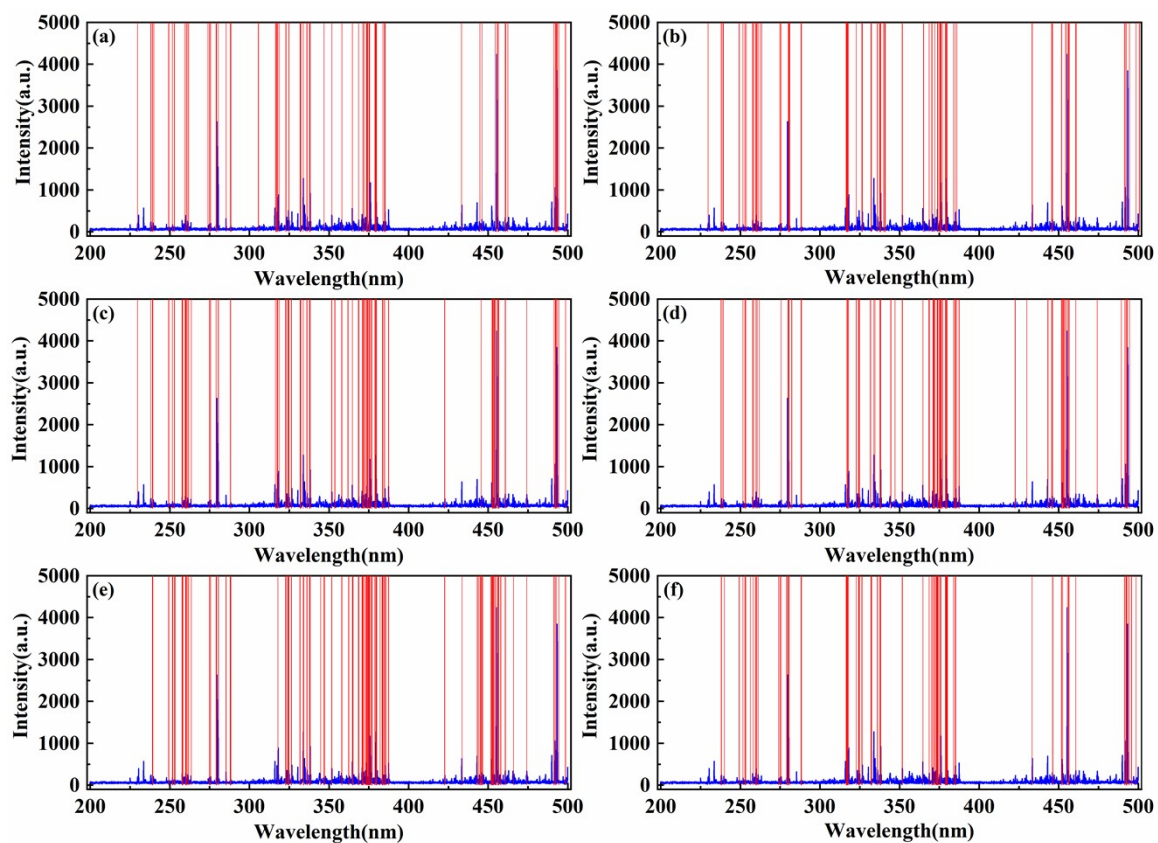

Fig. S1 Variable Selection Based on CARS [(a) La; (b) Ce; (c) Pr; (d) Nd; (e) Sm; (f) TREO].

Table S1 Prediction results of the PLS correction model based on different smoothing points (3-25) of D1st

| REEs | Smoothing points | LV        | R <sup>2</sup> <sub>cv</sub> | MRE <sub>cv</sub> | REEs | Smoothing points | LV        | R <sup>2</sup> <sub>cv</sub> | MRE <sub>cv</sub> |
|------|------------------|-----------|------------------------------|-------------------|------|------------------|-----------|------------------------------|-------------------|
| La   | 3                | 3         | 0.8006                       | 0.4087            | Ce   | 3                | 3         | 0.7628                       | 0.3333            |
|      | 5                | 3         | 0.7975                       | 0.4075            |      | 5                | 3         | 0.7600                       | 0.3314            |
|      | 7                | 3         | 0.7951                       | 0.4077            |      | 7                | 3         | 0.7587                       | 0.326             |
|      | 9                | 12        | 0.9109                       | 0.4061            |      | <b>9</b>         | <b>3</b>  | <b>0.7584</b>                | <b>0.3203</b>     |
|      | 11               | 12        | 0.9096                       | 0.4004            |      | 11               | 3         | 0.7557                       | 0.3225            |
|      | 13               | 12        | 0.9070                       | 0.4073            |      | 13               | 3         | 0.7506                       | 0.3251            |
|      | <b>15</b>        | <b>12</b> | <b>0.9133</b>                | <b>0.3866</b>     |      | 15               | 11        | 0.9051                       | 0.3275            |
|      | 17               | 12        | 0.9165                       | 0.3900            |      | 17               | 11        | 0.9058                       | 0.3304            |
|      | 19               | 11        | 0.9124                       | 0.4036            |      | 19               | 11        | 0.9026                       | 0.3398            |
|      | 21               | 11        | 0.9105                       | 0.4282            |      | 21               | 3         | 0.7535                       | 0.3467            |
|      | 23               | 11        | 0.9108                       | 0.4429            |      | 23               | 3         | 0.7541                       | 0.3562            |
|      | 25               | 11        | 0.9129                       | 0.4339            |      | 25               | 3         | 0.7532                       | 0.3609            |
| Pr   | 3                | 8         | 0.8626                       | 0.3391            | Nd   | 3                | 8         | 0.8555                       | 0.3244            |
|      | 5                | 9         | 0.8790                       | 0.3269            |      | 5                | 9         | 0.8738                       | 0.3154            |
|      | 7                | 10        | 0.8843                       | 0.3217            |      | 7                | 10        | 0.8795                       | 0.3028            |
|      | 9                | 10        | 0.8904                       | 0.3148            |      | 9                | 10        | 0.8858                       | 0.2966            |
|      | 11               | 12        | 0.8906                       | 0.3067            |      | 11               | 10        | 0.8831                       | 0.2871            |
|      | 13               | 3         | 0.6818                       | 0.3150            |      | 13               | 10        | 0.8772                       | 0.2938            |
|      | <b>15</b>        | <b>11</b> | <b>0.8949</b>                | <b>0.3066</b>     |      | 15               | 10        | 0.8830                       | 0.2893            |
|      | 17               | 9         | 0.8864                       | 0.3092            |      | <b>17</b>        | <b>10</b> | <b>0.8821</b>                | <b>0.2859</b>     |
|      | 19               | 11        | 0.8906                       | 0.3134            |      | 19               | 10        | 0.8780                       | 0.2983            |
|      | 21               | 11        | 0.8904                       | 0.3164            |      | 21               | 9         | 0.8776                       | 0.3124            |
|      | 23               | 9         | 0.8834                       | 0.3310            |      | 23               | 9         | 0.8776                       | 0.3190            |
|      | 25               | 11        | 0.8914                       | 0.3312            |      | 25               | 9         | 0.8767                       | 0.3216            |
| Sm   | 3                | 8         | 0.8462                       | 0.3454            | TREO | 3                | 3         | 0.7720                       | 0.3326            |
|      | 5                | 9         | 0.8666                       | 0.3302            |      | 5                | 3         | 0.7692                       | 0.3310            |
|      | 7                | 10        | 0.8757                       | 0.3100            |      | 7                | 3         | 0.7677                       | 0.3268            |
|      | 9                | 10        | 0.8820                       | 0.3017            |      | <b>9</b>         | <b>3</b>  | <b>0.7672</b>                | <b>0.3227</b>     |
|      | 11               | 10        | 0.8792                       | 0.2902            |      | 11               | 3         | 0.7645                       | 0.3278            |
|      | 13               | 10        | 0.8734                       | 0.2941            |      | 13               | 3         | 0.7595                       | 0.3306            |
|      | 15               | 10        | 0.8792                       | 0.286             |      | 15               | 11        | 0.9064                       | 0.3311            |
|      | <b>17</b>        | <b>10</b> | <b>0.8785</b>                | <b>0.2835</b>     |      | 17               | 11        | 0.9076                       | 0.3312            |
|      | 19               | 10        | 0.8754                       | 0.2904            |      | 19               | 11        | 0.9044                       | 0.3396            |
|      | 21               | 10        | 0.8746                       | 0.3117            |      | 21               | 3         | 0.7625                       | 0.3499            |
|      | 23               | 10        | 0.8740                       | 0.3195            |      | 23               | 3         | 0.7633                       | 0.3547            |
|      | 25               | 10        | 0.8743                       | 0.3207            |      | 25               | 3         | 0.7627                       | 0.3595            |

Table S2 Prediction results of the PLS correction model based on different smoothing points (3-25) of D2nd

| REEs     | Smoothing points | LV        | R <sup>2</sup> <sub>cv</sub> | MRE <sub>cv</sub> | REEs      | Smoothing points | LV       | R <sup>2</sup> <sub>cv</sub> | MRE <sub>cv</sub> |
|----------|------------------|-----------|------------------------------|-------------------|-----------|------------------|----------|------------------------------|-------------------|
| La       | 3                | 3         | 0.8028                       | 0.4126            | Ce        | 3                | 3        | 0.7641                       | 0.3394            |
|          | 5                | 3         | 0.8000                       | 0.4087            |           | 5                | 3        | 0.7613                       | 0.339             |
|          | 7                | 3         | 0.7982                       | 0.4019            |           | 7                | 3        | 0.7603                       | 0.3333            |
|          | <b>9</b>         | <b>13</b> | <b>0.9021</b>                | <b>0.3937</b>     |           | <b>9</b>         | <b>3</b> | <b>0.7630</b>                | <b>0.3212</b>     |
|          | 11               | 3         | 0.7986                       | 0.4060            |           | 11               | 3        | 0.7627                       | 0.3257            |
|          | 13               | 3         | 0.7924                       | 0.4151            |           | 13               | 3        | 0.7563                       | 0.3237            |
|          | 15               | 11        | 0.9041                       | 0.4075            |           | 15               | 3        | 0.7540                       | 0.3232            |
|          | 17               | 13        | 0.9052                       | 0.4229            |           | 17               | 3        | 0.7573                       | 0.3324            |
|          | 19               | 13        | 0.8983                       | 0.4148            |           | 19               | 3        | 0.7604                       | 0.3306            |
|          | 21               | 3         | 0.7963                       | 0.4175            |           | 21               | 3        | 0.7602                       | 0.3412            |
|          | 23               | 3         | 0.7947                       | 0.4194            |           | 23               | 3        | 0.7596                       | 0.3373            |
|          | 25               | 3         | 0.7967                       | 0.4158            |           | 25               | 9        | 0.8944                       | 0.3322            |
|          | Pr               | 3         | 12                           | 0.8623            |           | 0.3526           | Nd       | 3                            | 12                |
| 5        |                  | 11        | 0.8714                       | 0.3381            | 5         | 11               |          | 0.8649                       | 0.3265            |
| 7        |                  | 9         | 0.8801                       | 0.3321            | 7         | 16               |          | 0.8719                       | 0.3181            |
| <b>9</b> |                  | <b>10</b> | <b>0.8866</b>                | <b>0.3265</b>     | 9         | 10               |          | 0.8816                       | 0.3098            |
| 11       |                  | 9         | 0.8850                       | 0.3116            | <b>11</b> | <b>12</b>        |          | <b>0.8789</b>                | <b>0.2989</b>     |
| 13       |                  | 3         | 0.6866                       | 0.3329            | 13        | 10               |          | 0.8644                       | 0.3232            |
| 15       |                  | 11        | 0.8878                       | 0.3135            | 15        | 9                |          | 0.8809                       | 0.3005            |
| 17       |                  | 11        | 0.8836                       | 0.3220            | 17        | 9                |          | 0.8729                       | 0.3025            |
| 19       |                  | 9         | 0.8780                       | 0.3280            | 19        | 9                |          | 0.8727                       | 0.3158            |
| 21       |                  | 11        | 0.8772                       | 0.3443            | 21        | 8                |          | 0.8617                       | 0.3216            |
| 23       |                  | 9         | 0.8799                       | 0.3351            | 23        | 8                |          | 0.8651                       | 0.3159            |
| 25       |                  | 9         | 0.8813                       | 0.3102            | 25        | 9                |          | 0.8762                       | 0.2992            |
| Sm       |                  | 3         | 13                           | 0.8471            | 0.3584    | TReO             |          | 3                            | 3                 |
|          | 5                | 11        | 0.8591                       | 0.3432            | 5         |                  | 3        | 0.7706                       | 0.3368            |
|          | 7                | 16        | 0.8672                       | 0.3304            | 7         |                  | 3        | 0.7695                       | 0.3315            |
|          | 9                | 10        | 0.8771                       | 0.3211            | <b>9</b>  |                  | <b>3</b> | <b>0.7719</b>                | <b>0.3211</b>     |
|          | 11               | 12        | 0.8740                       | 0.3137            | 11        |                  | 3        | 0.7717                       | 0.3266            |
|          | 13               | 10        | 0.8603                       | 0.3312            | 13        |                  | 3        | 0.7652                       | 0.3247            |
|          | <b>15</b>        | <b>12</b> | <b>0.8757</b>                | <b>0.3110</b>     | 15        |                  | 3        | 0.7631                       | 0.3250            |
|          | 17               | 11        | 0.8719                       | 0.3225            | 17        |                  | 3        | 0.7664                       | 0.3348            |
|          | 19               | 10        | 0.8659                       | 0.3255            | 19        |                  | 3        | 0.7695                       | 0.3320            |
|          | 21               | 11        | 0.8669                       | 0.3397            | 21        |                  | 3        | 0.7691                       | 0.3409            |
|          | 23               | 9         | 0.8681                       | 0.3363            | 23        |                  | 3        | 0.7685                       | 0.3363            |
|          | 25               | 9         | 0.8693                       | 0.3178            | 25        |                  | 3        | 0.7689                       | 0.3367            |

Table S3 The prediction results of the PLS correction model based on different parameters of WT (wavelet basis functions db2-db14, coif1-5; decomposition levels 1-15).

| REEs      | Wavelet basis function | Decomposition levels | $R^2_{cv}$    | $MRE_{cv}$    |
|-----------|------------------------|----------------------|---------------|---------------|
| <b>La</b> | db2                    | 10                   | 0.9722        | 0.3191        |
|           | db3                    | 15                   | 0.9719        | 0.2968        |
|           | db4                    | 11                   | 0.9719        | 0.3338        |
|           | db5                    | 6                    | 0.9731        | 0.3089        |
|           | db6                    | 13                   | 0.9732        | 0.2974        |
|           | db7                    | 15                   | 0.9706        | 0.2825        |
|           | db8                    | 12                   | 0.9737        | 0.3201        |
|           | db9                    | 7                    | 0.9718        | 0.2979        |
|           | db10                   | 9                    | 0.9702        | 0.3086        |
|           | db11                   | 10                   | 0.9716        | 0.3125        |
|           | db12                   | 6                    | 0.9717        | 0.2917        |
|           | <b>db13</b>            | <b>8</b>             | <b>0.9712</b> | <b>0.2773</b> |
|           | db14                   | 15                   | 0.9717        | 0.2884        |
|           | coif1                  | 10                   | 0.9719        | 0.3114        |
|           | coif2                  | 13                   | 0.9719        | 0.314         |
|           | coif3                  | 15                   | 0.9729        | 0.3127        |
|           | coif4                  | 14                   | 0.9734        | 0.3221        |
| coif5     | 3                      | 0.9686               | 0.3192        |               |
| <b>Ce</b> | db2                    | 10                   | 0.9662        | 0.2561        |
|           | db3                    | 12                   | 0.9612        | 0.2933        |
|           | db4                    | 1                    | 0.9572        | 0.3075        |
|           | db5                    | 15                   | 0.9666        | 0.2541        |
|           | db6                    | 14                   | 0.9674        | 0.2519        |
|           | db7                    | 10                   | 0.9639        | 0.2552        |
|           | db8                    | 9                    | 0.9676        | 0.2628        |
|           | <b>db9</b>             | <b>12</b>            | <b>0.9672</b> | <b>0.2263</b> |
|           | db10                   | 9                    | 0.9653        | 0.2531        |
|           | db11                   | 14                   | 0.9664        | 0.2535        |
|           | db12                   | 9                    | 0.9679        | 0.2475        |
|           | db13                   | 9                    | 0.9650        | 0.2545        |
|           | db14                   | 10                   | 0.9643        | 0.2501        |
|           | coif1                  | 13                   | 0.9632        | 0.2766        |
|           | coif2                  | 13                   | 0.9643        | 0.2811        |
|           | coif3                  | 13                   | 0.9655        | 0.2681        |
|           | coif4                  | 12                   | 0.9675        | 0.2583        |
| coif5     | 12                     | 0.9679               | 0.2632        |               |
| <b>Pr</b> | db2                    | 12                   | 0.9538        | 0.2521        |
|           | db3                    | 12                   | 0.946         | 0.2926        |
|           | db4                    | 6                    | 0.9482        | 0.3012        |
|           | db5                    | 10                   | 0.9547        | 0.2544        |
|           | db6                    | 11                   | 0.9572        | 0.2465        |

|           |            |           |               |               |
|-----------|------------|-----------|---------------|---------------|
|           | db7        | 14        | 0.9534        | 0.2567        |
|           | db8        | 9         | 0.9575        | 0.2508        |
|           | <b>db9</b> | <b>10</b> | <b>0.9574</b> | <b>0.2048</b> |
|           | db10       | 15        | 0.9564        | 0.2378        |
|           | db11       | 14        | 0.9553        | 0.2654        |
|           | db12       | 13        | 0.9606        | 0.2245        |
|           | db13       | 11        | 0.9563        | 0.2488        |
|           | db14       | 11        | 0.9537        | 0.2592        |
|           | coif1      | 5         | 0.949         | 0.2623        |
|           | coif2      | 12        | 0.9532        | 0.2718        |
|           | coif3      | 11        | 0.9543        | 0.2573        |
|           | coif4      | 15        | 0.9554        | 0.2546        |
|           | coif5      | 6         | 0.9537        | 0.2568        |
| <b>Nd</b> | db2        | 12        | 0.9487        | 0.2454        |
|           | db3        | 5         | 0.9376        | 0.2719        |
|           | db4        | 6         | 0.9435        | 0.2875        |
|           | db5        | 13        | 0.9498        | 0.2472        |
|           | db6        | 11        | 0.9526        | 0.2436        |
|           | db7        | 13        | 0.949         | 0.2525        |
|           | db8        | 9         | 0.9528        | 0.2445        |
|           | <b>db9</b> | <b>12</b> | <b>0.9537</b> | <b>0.1978</b> |
|           | db10       | 12        | 0.953         | 0.2295        |
|           | db11       | 14        | 0.95          | 0.2607        |
|           | db12       | 13        | 0.957         | 0.2173        |
|           | db13       | 11        | 0.952         | 0.2406        |
|           | db14       | 11        | 0.9494        | 0.2576        |
|           | coif1      | 5         | 0.9443        | 0.2522        |
|           | coif2      | 12        | 0.948         | 0.2659        |
|           | coif3      | 11        | 0.9491        | 0.2528        |
|           | coif4      | 6         | 0.9461        | 0.25          |
| coif5     | 6          | 0.9495    | 0.2485        |               |
| <b>Sm</b> | db2        | 12        | 0.9436        | 0.2637        |
|           | db3        | 4         | 0.9294        | 0.3057        |
|           | db4        | 3         | 0.9338        | 0.3144        |
|           | db5        | 13        | 0.9448        | 0.2701        |
|           | db6        | 11        | 0.9484        | 0.2648        |
|           | db7        | 12        | 0.9443        | 0.2727        |
|           | db8        | 9         | 0.9482        | 0.2622        |
|           | <b>db9</b> | <b>11</b> | <b>0.95</b>   | <b>0.2168</b> |
|           | db10       | 13        | 0.949         | 0.254         |
|           | db11       | 14        | 0.9453        | 0.2817        |
|           | db12       | 13        | 0.9531        | 0.2357        |
|           | db13       | 11        | 0.9486        | 0.2563        |
|           | db14       | 11        | 0.9455        | 0.2812        |

|  |            |           |               |               |
|--|------------|-----------|---------------|---------------|
|  | coif1      | 5         | 0.938         | 0.2782        |
|  | coif2      | 12        | 0.9428        | 0.2841        |
|  | coif3      | 11        | 0.9438        | 0.2756        |
|  | coif4      | 6         | 0.941         | 0.2725        |
|  | coif5      | 6         | 0.9449        | 0.2714        |
|  | db2        | 10        | 0.9673        | 0.2546        |
|  | db3        | 12        | 0.9635        | 0.2823        |
|  | db4        | 1         | 0.9593        | 0.2986        |
|  | db5        | 10        | 0.9679        | 0.2443        |
|  | db6        | 13        | 0.9686        | 0.255         |
|  | db7        | 10        | 0.9652        | 0.2501        |
|  | db8        | 10        | 0.9686        | 0.2655        |
|  | <b>db9</b> | <b>12</b> | <b>0.9678</b> | <b>0.2342</b> |
|  | db10       | 9         | 0.9659        | 0.2616        |
|  | db11       | 15        | 0.9677        | 0.2517        |
|  | db12       | 14        | 0.9703        | 0.2467        |
|  | db13       | 9         | 0.9661        | 0.2509        |
|  | db14       | 15        | 0.9658        | 0.2458        |
|  | coif1      | 5         | 0.963         | 0.2722        |
|  | coif2      | 12        | 0.9656        | 0.2805        |
|  | coif3      | 12        | 0.9673        | 0.2605        |
|  | coif4      | 12        | 0.9692        | 0.2527        |
|  | coif5      | 12        | 0.9693        | 0.2543        |

TREO

Table S4 Results of PLS correction model constructed by single and hybrid preprocessing.

| REEs      | Parameter     | LV        | Model         | R <sup>2</sup> <sub>cv</sub> | MRE <sub>CV</sub> |
|-----------|---------------|-----------|---------------|------------------------------|-------------------|
| <b>La</b> | /             | 13        | Raw           | 0.911                        | 0.5357            |
|           | 15            | 12        | D1st          | 0.9133                       | 0.3866            |
|           | 9             | 13        | D2nd          | 0.9021                       | 0.3937            |
|           | db13/11       | 11        | wt            | 0.9556                       | 0.3523            |
|           | /             | 4         | Nor           | 0.8892                       | 0.4808            |
|           | /             | 8         | MSC           | 0.9587                       | 0.3528            |
|           | /             | 8         | SNV           | 0.9679                       | 0.3425            |
|           | <b>db13/8</b> | <b>10</b> | <b>SNV-WT</b> | <b>0.9712</b>                | <b>0.2773</b>     |
|           | db13/11       | 10        | WT-SNV        | 0.9697                       | 0.3063            |
|           | 15-db8/5      | 9         | D1st-WT       | 0.9356                       | 0.3436            |
|           | db13/11-3     | 13        | WT-D1st       | 0.9405                       | 0.3525            |
| <b>Ce</b> | /             | 10        | Raw           | 0.8965                       | 0.4451            |
|           | 9             | 3         | D1st          | 0.7584                       | 0.3203            |
|           | 9             | 3         | D2nd          | 0.763                        | 0.3212            |
|           | db13/13       | 12        | wt            | 0.9436                       | 0.2675            |
|           | /             | 4         | Nor           | 0.9211                       | 0.398             |
|           | /             | 6         | MSC           | 0.9361                       | 0.3064            |
|           | /             | 6         | SNV           | 0.9569                       | 0.2459            |
|           | <b>db9/12</b> | <b>9</b>  | <b>SNV-WT</b> | <b>0.9672</b>                | <b>0.2263</b>     |
|           | db13/13       | 7         | WT-SNV        | 0.9472                       | 0.2805            |
|           | 9-db6/2       | 10        | D1st-WT       | 0.9293                       | 0.2769            |
|           | db13/13-21    | 15        | WT-D1st       | 0.9441                       | 0.2334            |
| <b>Pr</b> | /             | 10        | Raw           | 0.8786                       | 0.4073            |
|           | 15            | 11        | D1st          | 0.8949                       | 0.3066            |
|           | 9             | 1         | D2nd          | 0.8813                       | 0.3102            |
|           | db13/15       | 10        | wt            | 0.9222                       | 0.2691            |
|           | /             | 7         | Nor           | 0.9158                       | 0.3181            |
|           | /             | 6         | MSC           | 0.8959                       | 0.3545            |
|           | /             | 6         | SNV           | 0.9315                       | 0.2748            |
|           | <b>db9/10</b> | <b>11</b> | <b>SNV-WT</b> | <b>0.9574</b>                | <b>0.2048</b>     |
|           | db13/15       | 12        | WT-SNV        | 0.9512                       | 0.262             |
|           | 15-db6/6      | 10        | D1st-WT       | 0.9222                       | 0.2586            |
|           | db13/15-9     | 15        | WT-D1st       | 0.9232                       | 0.2299            |
| <b>Nd</b> | /             | 10        | Raw           | 0.8713                       | 0.3848            |
|           | 17            | 10        | D1st          | 0.8821                       | 0.2859            |
|           | 11            | 12        | D2nd          | 0.8789                       | 0.2989            |
|           | db10/3        | 11        | wt            | 0.9110                       | 0.2634            |
|           | /             | 8         | Nor           | 0.9081                       | 0.3232            |
|           | /             | 8         | MSC           | 0.8909                       | 0.3649            |
|           | /             | 6         | SNV           | 0.9193                       | 0.2980            |
|           | <b>db9/12</b> | <b>12</b> | <b>SNV-WT</b> | <b>0.9537</b>                | <b>0.1978</b>     |
|           | db10/3        | 6         | WT-SNV        | 0.9090                       | 0.2788            |

|             |               |           |               |               |               |
|-------------|---------------|-----------|---------------|---------------|---------------|
|             | 17-db6/6      | 11        | D1st-WT       | 0.9102        | 0.2558        |
|             | db10/3-13     | 10        | WT-D1st       | 0.9068        | 0.2339        |
|             | /             | 10        | Raw           | 0.8640        | 0.3984        |
|             | 17            | 10        | D1st          | 0.8785        | 0.2835        |
|             | 15            | 12        | D2nd          | 0.8757        | 0.311         |
|             | db11/15       | 9         | wt            | 0.9172        | 0.2666        |
|             | /             | 8         | Nor           | 0.9000        | 0.3319        |
| <b>Sm</b>   | /             | 8         | MSC           | 0.8779        | 0.3963        |
|             | /             | 8         | SNV           | 0.9159        | 0.3273        |
|             | <b>db9/11</b> | <b>11</b> | <b>SNV-WT</b> | <b>0.9500</b> | <b>0.2168</b> |
|             |               | 6         | WT-SNV        | 0.8958        | 0.3111        |
|             | 17-db6/12     | 10        | D1st-WT       | 0.9061        | 0.2568        |
|             | db11/15-13    | 10        | WT-D1st       | 0.9026        | 0.2608        |
|             | /             | 10        | Raw           | 0.8991        | 0.4433        |
|             | 9             | 3         | D1st          | 0.7672        | 0.3227        |
|             | 9             | 3         | D2nd          | 0.7719        | 0.3211        |
|             | db13/15       | 9         | wt            | 0.9433        | 0.2711        |
|             | /             | 4         | Nor           | 0.9198        | 0.3959        |
| <b>TREO</b> | /             | 6         | MSC           | 0.9412        | 0.2925        |
|             | /             | 6         | SNV           | 0.9590        | 0.2456        |
|             | <b>db9/12</b> | <b>10</b> | <b>SNV-WT</b> | <b>0.9678</b> | <b>0.2342</b> |
|             | db13/15       | 10        | WT-SNV        | 0.9609        | 0.2764        |
|             | 9-db6/2       | 12        | D1st-WT       | 0.9245        | 0.2786        |
|             | db13/15-25    | 15        | WT-D1st       | 0.9451        | 0.2516        |

Table S5 Results of PLS correction model constructed by optimal preprocessing combined with different variable selection methods.

| REEs        | Parameter        | LV        | Model              | Number of variables | R <sup>2</sup> <sub>cv</sub> | MRE <sub>cv</sub> |
|-------------|------------------|-----------|--------------------|---------------------|------------------------------|-------------------|
| <b>La</b>   | /                | 13        | Raw                | 5784                | 0.9110                       | 0.5357            |
|             | 6; 3             | 10        | SNV-WT-siPLS       | 2892                | 0.9648                       | 0.3188            |
|             | 0.9              | 12        | SNV-WT-VIP         | 361                 | 0.9706                       | 0.3391            |
|             | 30; 0.7; 2       | 4         | SNV-WT-PSO         | 247                 | 0.9479                       | 0.2941            |
|             | /                | 13        | SNV-WT-MI          | 400                 | 0.9690                       | 0.3233            |
|             | <b>N=90, K=5</b> | <b>10</b> | <b>SNV-WT-CARS</b> | <b>72</b>           | <b>0.9981</b>                | <b>0.0615</b>     |
| <b>Ce</b>   | /                | 10        | Raw                | 5784                | 0.8965                       | 0.4451            |
|             | 6; 3             | 5         | SNV-WT-siPLS       | 2892                | 0.9385                       | 0.2571            |
|             | 0.9              | 6         | SNV-WT-VIP         | 341                 | 0.9351                       | 0.2681            |
|             | 30; 0.7; 2       | 8         | SNV-WT-PSO         | 229                 | 0.9456                       | 0.2780            |
|             | /                | 7         | SNV-WT-MI          | 400                 | 0.9396                       | 0.2720            |
|             | <b>N=95, K=3</b> | <b>15</b> | <b>SNV-WT-CARS</b> | <b>117</b>          | <b>0.9992</b>                | <b>0.0340</b>     |
| <b>Pr</b>   | /                | 10        | Raw                | 5784                | 0.8786                       | 0.4073            |
|             | 6; 3             | 9         | SNV-WT-siPLS       | 2892                | 0.9419                       | 0.2600            |
|             | 0.8              | 11        | SNV-WT-VIP         | 338                 | 0.9409                       | 0.2850            |
|             | 30; 0.7; 2       | 5         | SNV-WT-PSO         | 250                 | 0.9298                       | 0.2595            |
|             | /                | 12        | SNV-WT-MI          | 400                 | 0.9251                       | 0.2820            |
|             | <b>N=55, K=5</b> | <b>16</b> | <b>SNV-WT-CARS</b> | <b>125</b>          | <b>0.9987</b>                | <b>0.0490</b>     |
| <b>Nd</b>   | /                | 10        | Raw                | 5784                | 0.8713                       | 0.3848            |
|             | 6; 3             | 9         | SNV-WT-siPLS       | 2892                | 0.9361                       | 0.2676            |
|             | 0.9              | 11        | SNV-WT-VIP         | 3856                | 0.9352                       | 0.2799            |
|             | 30; 0.7; 2       | 5         | SNV-WT-PSO         | 1444                | 0.9224                       | 0.2495            |
|             | /                | 9         | SNV-WT-MI          | 337                 | 0.9097                       | 0.2813            |
|             | <b>N=55, K=3</b> | <b>19</b> | <b>SNV-WT-CARS</b> | <b>125</b>          | <b>0.9986</b>                | <b>0.0451</b>     |
| <b>Sm</b>   | /                | 10        | Raw                | 5784                | 0.8640                       | 0.3984            |
|             | 6; 3             | 7         | SNV-WT-siPLS       | 2892                | 0.9159                       | 0.3548            |
|             | 1.0              | 6         | SNV-WT-VIP         | 3856                | 0.9275                       | 0.2755            |
|             | 30; 0.7; 2       | 6         | SNV-WT-PSO         | 1444                | 0.9281                       | 0.2813            |
|             | /                | 15        | SNV-WT-MI          | 341                 | 0.9299                       | 0.2961            |
|             | <b>N=55, K=3</b> | <b>16</b> | <b>SNV-WT-CARS</b> | <b>167</b>          | <b>0.9962</b>                | <b>0.0766</b>     |
| <b>TREO</b> | /                | 10        | Raw                | 5784                | 0.8991                       | 0.4433            |
|             | 6; 3             | 5         | SNV-WT-siPLS       | 2892                | 0.9399                       | 0.2785            |
|             | 0.9              | 6         | SNV-WT-VIP         | 341                 | 0.9395                       | 0.2762            |
|             | 30; 0.7; 2       | 5         | SNV-WT-PSO         | 247                 | 0.9526                       | 0.2132            |
|             | /                | 10        | SNV-WT-MI          | 400                 | 0.9529                       | 0.2785            |
|             | <b>N=90, K=3</b> | <b>17</b> | <b>SNV-WT-CARS</b> | <b>112</b>          | <b>0.9991</b>                | <b>0.0453</b>     |
